# Supplementary material
Source: PubMed Central journal article supplement (PMC9036407)
Supplement: NIHMS1797410-supplement-Materials.pdf [file NIHMS1797410-supplement-Materials.pdf]

Materials List for

# Nitroreductase/Metronidazole-Mediated Ablation and a MATLAB Platform (RpEGEN) for Studying Regeneration of the Zebrafish Retinal Pigment Epithelium

Lyndsay L. Leach<sup>1</sup>, G. Burch Fisher<sup>2</sup>, Jeffrey M. Gross<sup>1,3</sup>

<sup>1</sup>Department of Ophthalmology, Louis J. Fox Center for Vision Restoration, University of Pittsburgh School of Medicine <sup>2</sup>Earth Research Institute, University of California, Santa Barbara <sup>3</sup>Department of Developmental Biology, University of Pittsburgh School of Medicine

## Corresponding Author

Lyndsay L. Leach

ll42@pitt.edu

## Citation

Leach, L.L., Fisher, G.B., Gross, J.M. Nitroreductase/Metronidazole-Mediated Ablation and a MATLAB Platform (RpEGEN) for Studying Regeneration of the Zebrafish Retinal Pigment Epithelium. *J. Vis. Exp.* (), e63658, doi:10.3791/63658 (2022).

## Date Published

March 2, 2022

## DOI

10.3791/63658

## URL

jove.com/video/63658

## Materials

| Name                                                           | Company           | Catalog Number | Comments                                                                                            |
|----------------------------------------------------------------|-------------------|----------------|-----------------------------------------------------------------------------------------------------|
| <b>Lab Material/Equipment</b>                                  |                   |                |                                                                                                     |
| 2-(4-Amidinophenyl)-6-indolecarbamidine dihydrochloride (DAPI) | Millipore Sigma   | D9542          |                                                                                                     |
| 6-well plates                                                  | Fisher Scientific | 07-200-83      |                                                                                                     |
| Conical Polypropylene Centrifuge Tubes                         | Fisher Scientific | 05-539-13      | Catalog number is for 50 mL tubes                                                                   |
| Diamond tip scribing pen                                       | Fisher Scientific | 50-254-51      | Manufactured by Electron Microscopy Sciences, items similar to this part number are adequate        |
| Dimethyl sulfoxide (DMSO) ≥99.7 %                              | Fisher Scientific | BP231          | Check institutional chemical waste disposal requirements                                            |
| Embryo incubator (large)                                       | Fisher Scientific | 3720A          |                                                                                                     |
| Embryo incubator (mini/tabletop)                               | Labnet            | I5110A         |                                                                                                     |
| Fluorescence stereo microscope                                 | Zeiss             | Axio Zoom.V16  | Or similar, with 488 nm excitation laser/filter                                                     |
| Glass Pasteur pipette                                          | Fisher Scientific | 13-678-4       | Manufactured by Corning, non-sterile                                                                |
| InSolution Wnt Antagonist I, IWR-1-endo                        | Millipore Sigma   | 5.04462        | Manufactured by Calbiochem; 25 mM in DMSO; check institutional chemical waste disposal requirements |
| Methylene blue (powder)                                        | Fisher Scientific | BP117-100      | Also available as a premade aqueous solution                                                        |
| Metronidazole (MTZ)                                            | Millipore Sigma   | M3761          | Check institutional chemical waste disposal requirements                                            |
| N-phenylthiourea (PTU)                                         | Millipore Sigma   | P7629          | Check institutional chemical waste disposal requirements                                            |
| Paraformaldehyde (16 % w/v) methanol free                      | Fisher Scientific | AA433689M      | Chemical waste, proper disposal required                                                            |
| Petri dishes                                                   | Fisher Scientific | FB0875712      | 10 cm diameter                                                                                      |

|                                                |                            |                                                                                                                                                                                                                                                         |                                                                                                                          |
|------------------------------------------------|----------------------------|---------------------------------------------------------------------------------------------------------------------------------------------------------------------------------------------------------------------------------------------------------|--------------------------------------------------------------------------------------------------------------------------|
| Phosphate buffered saline (powder packets)     | Millipore Sigma            | P3813                                                                                                                                                                                                                                                   | Used to make 10 X PBS stock                                                                                              |
| Pronase                                        | Millipore Sigma            | PRON-RO                                                                                                                                                                                                                                                 |                                                                                                                          |
| Shaking incubator                              | Benchmark                  | H2010                                                                                                                                                                                                                                                   | Used for incubating MTZ for 1 hour at 37 degrees Celcius                                                                 |
| Stereo microscope                              | Leica                      | S9i                                                                                                                                                                                                                                                     | Or similar, with transmitted light illumination                                                                          |
| Student Dumont #5 forceps                      | Fine Science Tools         | 91150-20                                                                                                                                                                                                                                                | Fine-tipped forceps for manual dechoriation                                                                              |
| Tabletop rotator/shaker                        | Scilogex                   | SK-D1807-E                                                                                                                                                                                                                                              |                                                                                                                          |
| Transfer pipette                               | Millipore Sigma            | Z135003                                                                                                                                                                                                                                                 | 3.2 mL bulb draw, non-sterile                                                                                            |
| Tricaine methanesulfonate (MS-222)             | Pentair                    | TRS1, TRS2, TRS5                                                                                                                                                                                                                                        | Also available from Fisher Scientific (NC0342409)                                                                        |
| VECTASHIELD Antifade Mounting Medium with DAPI | Vector Laboratories        | H-1200                                                                                                                                                                                                                                                  |                                                                                                                          |
| <b>Software Material</b>                       |                            |                                                                                                                                                                                                                                                         |                                                                                                                          |
| FIJI (Fiji is Just ImageJ)                     | FIJI (Fiji is Just ImageJ) | <a href="https://imagej.net/software/fiji/">https://imagej.net/software/fiji/</a>                                                                                                                                                                       | Version: 2.0.0-rc-69/1.52p; Build: 269a0ad53f; Plugin needed: Bio-Formats                                                |
| GRAMM examples and how-tos                     | MathWorks                  | <a href="https://www.mathworks.com/matlabcentral/fileexchange/54465-gramm-complete-data-visualization-toolbox-ggplot2-r-like">https://www.mathworks.com/matlabcentral/fileexchange/54465-gramm-complete-data-visualization-toolbox-ggplot2-r-like</a> . |                                                                                                                          |
| MATLAB                                         | MathWorks                  | <a href="https://www.mathworks.com/products/get-matlab.html">https://www.mathworks.com/products/get-matlab.html</a>                                                                                                                                     | Toolboxes needed to run RpEGEN: Image Processing Toolbox, Curve Fitting Toolbox, Statistics and Machine Learning Toolbox |
| MATLAB support                                 | MathWorks                  | <a href="https://www.mathworks.com/support.html">https://www.mathworks.com/support.html</a>                                                                                                                                                             |                                                                                                                          |
